# Supplementary material for: Back to pristine levels: a meta-analysis of suspended sediment transport in large German river channels
Source: Copernicus journal article supplement (doi:10.5194/esurf-2022-45), 2022-09-06
Supplement: Supplementary file 2 [file esurf-2022-45-supplement.zip]

Archive with 2 entries (2 files):
- SSC_Trend_Supplement_Tables_S1_S2.xlsx
- esurf-2022-45-supplement-version1.pdf
