# Supplementary material for: Back to pristine levels: a meta-analysis of suspended sediment transport in large German river channels
Source: Copernicus journal article supplement (doi:10.5194/esurf-2022-45), 2022-09-06
Supplement: Supplementary file 2 [file esurf-2022-45-supplement.zip › SSC_Trend_Supplement_Tables_S1_S2.xlsx]

## Sheet: Tab. S1 station data
station			ERTS1989-coordinates		river name	catchment size (km²)	monitoring			hydrogeomorphic characteristics
ID	name	short name	RW	HW			start date	end date	timerange (years)	Qm (m³/s)	SSCm (mg/l)	SSLm (t/d)
102	Straubing	Str	3.2762e+07	5.42099e+06	Danube	36955	1989-11-01	2010-10-30	21.0082	461.441	16.5267	9.12709
105	Vilshofen	Vil	3.28084e+07	5.39544e+06	Danube	47677	1989-11-01	2010-10-30	21.0082	639.049	19.054	15.1746
106	Kachlet	Kac	3.28251e+07	5.39006e+06	Danube	49649	1989-11-01	2010-10-30	21.0082	644.168	19.6475	14.224
107	Jochenstein	Joc	3.28477e+07	5.38463e+06	Danube	77053	1989-11-01	2010-10-30	21.0082	1389.91	46.0104	91.4161
202	Weil	Wei	3.23933e+07	5.27416e+06	Rhine	36472	1989-11-01	2010-10-30	21.0082	1064.69	34.4902	46.7451
203	Kehl	Keh	3.24116e+07	5.3813e+06	Rhine	39330	1989-11-01	2010-10-30	21.0082	1236.92	13.6066	21.0996
205	Nierstein	Nie	3.24536e+07	5.52388e+06	Rhine	70387	1989-11-01	2010-10-30	21.0082	1410.74	21.8804	37.041
206	Plittersdorf	Pli	3.24364e+07	5.41479e+06	Rhine	48276	1989-11-01	2010-10-30	21.0082	1236.92	19.7528	29.961
207	Maxau	Max	3.24491e+07	5.43203e+06	Rhine	50196	1989-11-01	2010-10-30	21.0082	1249.48	22.218	33.599
212	Weißenthurm	Wei	3.23902e+07	5.58701e+06	Rhine	138647	1989-11-01	2010-10-30	21.0082	2073.63	30.3889	83.011
215	Emmerich	Emm	3.23102e+07	5.74544e+06	Rhine	159555	1989-11-01	2010-10-30	21.0082	2261.12	29.5571	76.5315
216	Düsseldorf	Düs	3.23441e+07	5.67729e+06	Rhine	147680	1989-11-01	2010-10-30	21.0082	2123.04	17.9151	44.1201
217	St. Goar	St_	3.24077e+07	5.55692e+06	Rhine	103842	1989-11-01	2010-10-30	21.0082	1686.93	24.2452	47.1735
221	Poppenweiler	Pop	3.2518e+07	5.41772e+06	Neckar	5005	1989-11-01	2010-10-30	21.0082	61.0919	24.0865	2.87117
222	Rockenau	Roc	3.25004e+07	5.47552e+06	Neckar	12676	1989-11-01	2010-10-30	21.0082	139.372	28.732	8.35374
223	Lauffen	Lau	3.25116e+07	5.43557e+06	Neckar	7916	1989-11-01	2010-10-30	21.0082	85.2551	22.0747	3.99391
231	Viereth	Vie	3.26283e+07	5.53169e+06	Main	12010	1989-11-01	2005-12-28	16.1671	107.719	16.9291	2.2882
232	Marktbreit	Mar	3.25811e+07	5.50815e+06	Main	13693	1989-11-01	2010-10-30	21.0082	115.344	20.6953	2.88032
233	Kleinheubach	Kle	3.25163e+07	5.50719e+06	Main	21505	1989-11-01	2010-10-30	21.0082	172.343	25.2631	6.34588
235	Garstadt	Gar	3.25843e+07	5.53687e+06	Main	12722	1989-11-01	2005-12-31	16.1753	111.982	22.0096	3.36318
236	Erlabrunn	Erl	3.25613e+07	5.52293e+06	Main	14244	1989-11-01	2005-12-30	16.1726	120.994	23.7738	3.65288
237	Steinbach	Ste	3.25476e+07	5.54522e+06	Main	17914	1989-11-01	2010-10-30	21.0082	137.227	21.353	3.42822
239	Eddersheim	Edd	3.24625e+07	5.54312e+06	Main	27100	1989-11-01	2010-10-30	21.0082	213.515	27.6444	8.04016
241	Kalkofen	Kal	3.24214e+07	5.57394e+06	Lahn	5303	1989-11-01	2010-10-30	21.0082	44.7045	20.9178	1.83788
242	Wetzlar	Wet	3.24645e+07	5.6005e+06	Lahn	2669	1989-11-01	2007-08-23	17.8192	27.9709	20.3315	0.872275
251	Wincheringen	Win	3.23126e+07	5.49836e+06	Mosel	11522	1989-11-01	2010-10-30	21.0082	142.575	31.3288	8.46381
257	Cochem	Coc	3.23693e+07	5.55759e+06	Mosel	27165	1989-11-01	2010-10-30	21.0082	318.231	27.2007	16.9194
258	Brodenbach	Bro	3.23886e+07	5.56488e+06	Mosel	27872	1989-11-01	2009-09-25	19.9123	324.704	28.9272	18.2172
260	Güdingen	Güd	3.2356e+07	5.45138e+06	Saar	3811	1989-11-01	2010-10-30	21.0082	40.3006	12.988	1.0406
277	Hamm. Wehr	Ham	3.24185e+07	5.72687e+06	Lippe	2607	1989-11-01	2010-10-30	21.0082	24.7239	14.6864	0.489907
281	Reckingen	Rec	3.24502e+07	5.26884e+06	Rhine	14718	1989-11-01	2010-10-30	21.0082	441.589	16.2603	8.60189
282	Albbruck Dogern	Alb	3.24378e+07	5.27197e+06	Rhine	33987	1989-11-01	2010-10-30	21.0082	1034.26	21.0076	28.747
301	Rheine	Rhe	3.23935e+07	5.79347e+06	Ems	3740	1989-11-01	2010-10-30	21.0082	37.9247	20.958	0.851034
303	Lathen	Lat	3.23863e+07	5.85875e+06	Ems	8686	1989-11-01	2010-10-30	21.0082	83.0946	13.7133	1.24092
401	Hann.-Münden.W.	Han	3.25453e+07	5.6966e+06	Werra	5497	1989-11-01	2010-10-30	21.0082	48.13	44.6611	2.72104
402	Hann.-Münden.F.	Han	3.25451e+07	5.69615e+06	Fulda	6947	1989-11-01	2010-10-30	21.0082	62.2148	25.4295	2.20243
403	Bodenwerder	Bod	3.25354e+07	5.75829e+06	Weser	15924	1989-11-01	2010-10-30	21.0082	147.327	23.1946	4.02256
405	Intschede	Int	3.25102e+07	5.8682e+06	Weser	37720	1989-11-01	2010-10-30	21.0082	324.473	35.7662	14.8521
406	Hameln	Ham	3.2524e+07	5.77267e+06	Weser	17077	1989-11-01	2010-10-30	21.0082	162.45	29.9969	6.21636
407	Höxter	Höx	3.25275e+07	5.73624e+06	Weser	15501	1989-11-01	2010-10-30	21.0082	142.558	30.2015	5.74251
408	Nienburg	Nie	3.25138e+07	5.83264e+06	Weser	21815	1989-11-01	2010-10-30	21.0082	201.421	29.1089	7.44749
411	Marklendorf	Mar	3.25477e+07	5.83703e+06	Aller	7209	1989-11-01	2010-10-30	21.0082	37.75	14.1029	0.57001
412	Rethem	Ret	3.25261e+07	5.84853e+06	Aller	14730	1989-11-01	2010-10-30	21.0082	111.836	20.4563	2.33819
421	Herrenhausen	Her	3.25471e+07	5.80368e+06	Leine	5304	1989-11-01	2006-04-13	16.4575	51.2522	30.5373	2.23386
502	Hitzacker	Hit	3.26371e+07	5.89159e+06	Elbe	129877	1989-11-01	2010-10-30	21.0082	671.448	33.299	19.3166
511	Pirna	Pir	3.28467e+07	5.65752e+06	Elbe	52080	1991-11-01	2010-10-30	19.0082	322.687	25.0252	11.0459
512	Torgau	Tor	3.27781e+07	5.71927e+06	Elbe	55211	1993-11-01	2010-10-30	17.0055	361.889	34.6593	16.3879
513	Wittenberg	Wit	3.27492e+07	5.75184e+06	Elbe	61879	1991-11-01	2010-10-30	19.0082	367.694	30.3579	11.9569
514	Aken	Ake	3.27105e+07	5.74978e+06	Elbe	69849	1991-11-01	2010-10-30	19.0082	429.307	26.6302	10.7869
515	Barby	Bar	3.26987e+07	5.76185e+06	Elbe	94060	1989-11-01	2010-10-30	21.0082	550.006	35.6982	20.1803
516	Magdeburg Strombr.	Mag	3.2681e+07	5.77862e+06	Elbe	94942	1992-11-01	2010-10-30	18.0055	554.767	28.0644	16.0094
518	Tangermünde	Tan	3.27024e+07	5.82634e+06	Elbe	97780	1991-11-01	2010-10-30	19.0082	560.8	33.8497	17.908
519	Wittenberge	Wit	3.26845e+07	5.87445e+06	Elbe	123532	1993-11-01	2010-10-30	17.0055	696.605	34.4449	21.3281
520	Meissen	Mei	3.28123e+07	5.67862e+06	Elbe	53885	1994-11-01	2010-10-30	16.0055	341.922	26.9755	10.3353
531	Calbe	Cal	3.26915e+07	5.75407e+06	Saale	23719	1991-11-01	2010-10-30	19.0082	112.964	29.3992	3.73311
541	Rathenow	Rat	3.27249e+07	5.83372e+06	Havel	19288	1991-11-01	2010-10-30	19.0082	73.2267	17.2038	1.21603
542	Ketzin	Ket	3.27618e+07	5.8195e+06	Havel	16173	1991-11-01	2010-10-30	19.0082	55.7093	14.9629	0.776265
543	Zehdenick	Zeh	3.27908e+07	5.87918e+06	Havel	2076	1991-11-01	2010-10-30	19.0082	10.0234	12.0928	0.11668
552	Fürstenwalde	Für	3.28447e+07	5.81258e+06	Spree	6354	1991-11-01	2010-10-30	19.0082	18.6176	11.8885	0.22215
601	Frankfurt	Fra	3.2878e+07	5.81576e+06	Oder	53580	1991-11-01	2010-10-30	19.0082	295.376	25.7814	7.07735
602	Hohensaaten	Hoh	3.2845e+07	5.86716e+06	Oder	109564	1991-11-01	2010-10-30	19.0082	502	23.4412	10.591
603	Schwedt	Sch	3.28561e+07	5.88932e+06	Oder	112950	1991-11-01	2010-10-30	19.0082	502.893	25.4476	11.3257

## Sheet: Tab. S2 trends
Station	short	river name	ETRS1989-coordinates		time range					Qm	SSCm	SSLm	linear regression			Sen's slope		seasonal Sen's slope				trend of rating parameter
ID	name		RW	HW	start	end	# years	# bad years	# samples	(m³/s)	(mg l-1)	(kg s-1)	blin	R²	plin	bSens	pMK	bwinter	pwinter	bsummer	psummer	n	Da	pDa	Db	pDb		blin_%	bsens%	bsum%	bwin%
102	Str	Donau	3.2762e+07	5.42099e+06	1989-11-01	2010-10-30	21.0082	4	5999	461.441	16.5267	9.12709	-0.14	0.06	0.345	-0.111397	0.704853	0.10876	0.77308	0.031087	0.892558	16	-0.2836	0.003	0.0206	0.1506		-0.847113	-0.674042
105	Vil	Donau	3.28084e+07	5.39544e+06	1989-11-01	2010-10-30	21.0082	0	7474	639.049	19.054	15.1746	-0.45	0.44	0.00114	-0.435742	0.000996672	-0.51152	0.0235268	-0.571558	0.0212482	17	-0.3962	0.0012	0.0036	0.8293		-2.36171	-2.28687	-2.99967	-2.68457
106	Kac	Donau	3.28251e+07	5.39006e+06	1989-11-01	2010-10-30	21.0082	0	7462	644.168	19.6475	14.224	-0.74	0.4	0.00203	-0.689207	0.000326349	-0.827289	0.000326349	-0.981929	0.00315284	12	-0.5634	0.0038	-0.0572	0.0061		-3.76638	-3.50785	-4.99773	-4.21066
107	Joc	Donau	3.28477e+07	5.38463e+06	1989-11-01	2010-10-30	21.0082	0	7394	1389.91	46.0104	91.4161	-0.38	0.03	0.421	-0.332168	0.381187	-0.747475	0.00861079	1.26816	0.144292	19	-0.2214	0.2343	0.0133	0.621		-0.825899	-0.72194		-1.62458
202	Wei	Rhein	3.23933e+07	5.27416e+06	1989-11-01	2010-10-30	21.0082	2	6742	1064.69	34.4902	46.7451	-0.81	0.19	0.0523	-1.00863	0.111887	-0.947295	0.0103743	-1.34075	0.081443	18	-0.6756	0.0082	0.0351	0.2078		-2.34849	-2.9244	-3.88733	-2.74656
203	Keh	Rhein	3.24116e+07	5.3813e+06	1989-11-01	2010-10-30	21.0082	0	7586	1236.92	13.6066	21.0996	-0.41	0.32	0.00812	-0.493877	0.00599747	-0.65287	0.000644285	-0.563695	0.064411	17	-0.4781	0.0005	0.0674	0.0021		-3.01325	-3.62969	-4.14281	-4.7982
205	Nie	Rhein	3.24536e+07	5.52388e+06	1989-11-01	2010-10-30	21.0082	0	7574	1410.74	21.8804	37.041	-0.57	0.57	6.86e-05	-0.569666	0.000996672	-0.620076	0.00599747	-0.595399	0.0251783	20	-0.709	0	0.0736	0.0003		-2.60507	-2.60354	-2.72114	-2.83393
206	Pli	Rhein	3.24364e+07	5.41479e+06	1989-11-01	2010-10-30	21.0082	0	7562	1236.92	19.7528	29.961	-0.51	0.49	0.000386	-0.532621	0.00025836	-0.848494	0.00152084	-0.512686	0.127289	19	-0.4598	0.0015	0.0425	0.0431		-2.58191	-2.69643	-2.5955	-4.29555
207	Max	Rhein	3.24491e+07	5.43203e+06	1989-11-01	2010-10-30	21.0082	0	7587	1249.48	22.218	33.599	-0.93	0.71	1.61e-06	-0.97891	2.7003e-05	-1.06641	0.000802711	-1.17414	0.00205472	19	-1.0067	0	0.0776	0.0022		-4.18579	-4.40593	-5.28462	-4.79976
212	Wei	Rhein	3.23902e+07	5.58701e+06	1989-11-01	2010-10-30	21.0082	1	6789	2073.63	30.3889	83.011	-0.6	0.35	0.00454	-0.6175	0.00719835	-0.732332	0.183447	-0.739096	0.00255022	16	-0.5991	0.0007	0.0174	0.3491		-1.97441	-2.03199	-2.43213
215	Emm	Rhein	3.23102e+07	5.74544e+06	1989-11-01	2010-10-30	21.0082	0	7273	2261.12	29.5571	76.5315	-1	0.81	2.23e-08	-0.942104	3.33817e-07	-0.95351	0.00186908	-1.19346	2.0648e-05	15	-0.861	0	0.0442	0.0099		-3.38328	-3.1874	-4.03781	-3.22599
216	Düs	Rhein	3.23441e+07	5.67729e+06	1989-11-01	2010-10-30	21.0082	0	7252	2123.04	17.9151	44.1201	-1.12	0.74	5.02e-07	-1.12723	3.51909e-05	-1.22678	0.000160255	-1.30452	2.13579e-05	9	-0.7574	0.0236	-0.0363	0.2951		-6.2517	-6.29206	-7.28168	-6.84776
217	St_	Rhein	3.24077e+07	5.55692e+06	1989-11-01	2010-10-30	21.0082	0	7561	1686.93	24.2452	47.1735	-0.96	0.81	2.36e-08	-0.936746	1.57631e-06	-0.950135	0.00020383	-1.19803	2.84774e-05	18	-0.8752	0	0.0372	0.0403		-3.95954	-3.86363	-4.94132	-3.91885
220	Dei	Neckar	3.2528e+07	5.39611e+06	1989-11-01	2003-07-12																10	-0.9021	0.0079	0.0267	0.4264
221	Pop	Neckar	3.2518e+07	5.41772e+06	1989-11-01	2010-10-30	21.0082	0	7497	61.0919	24.0865	2.87117	-0.75	0.27	0.0147	-0.650688	0.00279439	-0.47713	0.0121987	-0.931386	0.0212482	18	-0.6295	0.0002	0.0131	0.1669		-3.11378	-2.70146	-3.86684	-1.9809
222	Roc	Neckar	3.25004e+07	5.47552e+06	1989-11-01	2010-10-30	21.0082	0	7515	139.372	28.732	8.35374	-1.27	0.63	1.94e-05	-1.28294	2.7003e-05	-1.37799	0.000644285	-1.18139	0.00164901	21	-0.9019	0	0.023	0.0179		-4.42016	-4.46522	-4.11177	-4.796
223	Lau	Neckar	3.25116e+07	5.43557e+06	1989-11-01	2010-10-30	21.0082	0	7545	85.2551	22.0747	3.99391	-1.16	0.51	0.000265	-0.973429	8.58724e-05	-1.15653	0.00152084	-1.03971	0.000517485	19	-0.7317	0	0.0042	0.7368		-5.25489	-4.40971	-4.70995	-5.23918
230	Has	Main	3.26078e+07	5.54301e+06	2005-12-01	2010-10-30
231	Vie	Main	3.26283e+07	5.53169e+06	1989-11-01	2005-12-28	16.1671	1	5692	107.719	16.9291	2.2882	-0.42	0.3	0.0225	-0.392488	0.0765137	-0.0879734	0.83682	-0.615358	0.0427634	14	-0.1899	0.2759	-0.0059	0.7062		-2.48093	-2.31842	-3.63491
232	Mar	Main	3.25811e+07	5.50815e+06	1989-11-01	2010-10-30	21.0082	0	7362	115.344	20.6953	2.88032	-0.93	0.61	2.77e-05	-1.01134	1.1947e-05	-0.844645	0.000644285	-1.33998	2.7003e-05	17	-0.894	0	-0.0129	0.226		-4.49377	-4.88679	-6.47479	-4.08133
233	Kle	Main	3.25163e+07	5.50719e+06	1989-11-01	2010-10-30	21.0082	0	7480	172.343	25.2631	6.34588	-0.96	0.64	1.38e-05	-0.94122	5.91464e-05	-1.05727	0.00861079	-1.10877	7.628e-05	18	-0.9137	0	0.0026	0.8703		-3.80001	-3.72567	-4.38888	-4.18502
235	Gar	Main	3.25843e+07	5.53687e+06	1989-11-01	2005-12-31	16.1753	1	5828	111.982	22.0096	3.36318	-0.99	0.53	0.000971	-1.01361	0.000628545	-0.859854	0.0765137	-1.10496	0.00602581	13	-0.8158	0.0263	-0.0326	0.2319		-4.49804	-4.6053	-5.02035	-3.90672
236	Erl	Main	3.25613e+07	5.52293e+06	1989-11-01	2005-12-30	16.1726	1	5819	120.994	23.7738	3.65288	-0.88	0.4	0.0065	-1.11051	0.0057818	-0.465794	0.303097	-1.82725	0.00037543	14	-0.3639	0.1563	-0.0174	0.3197		-3.70156	-4.67116	-7.68599
237	Ste	Main	3.25476e+07	5.54522e+06	1989-11-01	2010-10-30	21.0082	0	7397	137.227	21.353	3.42822	-0.6	0.48	0.00053	-0.588356	0.00412153	-0.117255	0.48735	-1.12862	2.7003e-05	15	-0.5373	0.0055	0.0178	0.0808		-2.80991	-2.75538	-5.28555
238	Eic	Main	3.25399e+07	5.51163e+06	1989-11-01	2010-10-30		14
239	Edd	Main	3.24625e+07	5.54312e+06	1989-11-01	2010-10-30	21.0082	0	7585	213.515	27.6444	8.04016	-0.99	0.46	0.000673	-0.951942	0.0121987	-0.849903	0.0571181	-1.00166	0.00025836	18	-0.9455	0.0003	-0.0022	0.8171		-3.58119	-3.44352	-3.62337	-3.07441
241	Kal	Lahn	3.24214e+07	5.57394e+06	1989-11-01	2010-10-30	21.0082	0	6625	44.7045	20.9178	1.83788	-0.5	0.27	0.0155	-0.505154	0.0170533	-0.0343177	0.871131	-0.939253	0.00186908	19	-0.2686	0.0523	0.0205	0.1438		-2.39031	-2.41495	-4.49021
242	Wet	Lahn	3.24645e+07	5.6005e+06	1989-11-01	2007-08-23	17.8192	0	6079	27.9709	20.3315	0.872275	-0.54	0.35	0.00913	-0.565488	0.0188534	-0.502519	0.0488796	-0.610054	0.303097	13	-0.3564	0.1222	-0.0042	0.7898		-2.65598	-2.78134		-2.47163
251	Win	Mosel	3.23126e+07	5.49836e+06	1989-11-01	2010-10-30	21.0082	0	7534	142.575	31.3288	8.46381	-0.8	0.51	0.000295	-0.862887	0.000326349	-0.796899	0.0371977	-0.850115	0.00020383	18	-0.3351	0.0267	0.0082	0.1997		-2.55356	-2.75429	-2.71353	-2.54366
256	Det	Mosel	3.23449e+07	5.51985e+06	1989-11-01	2002-03-27
257	Coc	Mosel	3.23693e+07	5.55759e+06	1989-11-01	2010-10-30	21.0082	0	7331	318.231	27.2007	16.9194	-0.61	0.35	0.00467	-0.612043	0.00228926	-0.528977	0.138967	-0.590662	0.000644285	18	-0.1789	0.1723	0.0006	0.9323		-2.24259	-2.2501	-2.1715
258	Bro	Mosel	3.23886e+07	5.56488e+06	1989-11-01	2009-09-25	19.9123	2	6314	324.704	28.9272	18.2172	-0.59	0.18	0.0594	-0.526853	0.0409545	-0.887204	0.0478046	-0.504947	0.0178636	13	-0.4066	0.1184	0.0022	0.8618		-2.0396	-1.8213	-1.74558	-3.06702
260	Güd	Saar	3.2356e+07	5.45138e+06	1989-11-01	2010-10-30	21.0082	0	7444	40.3006	12.988	1.0406	-1.13	0.65	1.12e-05	-0.966809	2.7003e-05	-1.01657	2.7003e-05	-0.841065	0.000316611	12	-0.5109	0.0134	-0.0167	0.094		-8.70031	-7.44384	-6.47569	-7.82697
263	Ser	Saar	3.23259e+07	5.49315e+06	1989-11-01	2001-04-26
266	Völ	Rossel	3.23548e+07	5.71443e+06	1989-11-01	1994-12-31
277	Ham	Lippe	3.24185e+07	5.72687e+06	1989-11-01	2010-10-30	21.0082	1	7174	24.7239	14.6864	0.489907	-0.49	0.45	0.00113	-0.474882	0.000316611	-0.391562	0.0743529	-0.561211	0.00581982	19	-0.5333	0.0001	0.0369	0.0214		-3.33643	-3.23349	-3.82131	-2.66616
281	Rec	Rhein	3.24502e+07	5.26884e+06	1989-11-01	2010-10-30	21.0082	0	7369	441.589	16.2603	8.60189	-0.45	0.33	0.00664	-0.411751	0.0144471	-0.3878	0.0121987	-0.364403	0.111887	16	-0.6902	0.003	0.0207	0.4282		-2.76748	-2.53225		-2.38495
282	Alb	Rhein	3.24378e+07	5.27197e+06	1989-11-01	2010-10-30	21.0082	0	7524	1034.26	21.0076	28.747	-0.94	0.68	4.84e-06	-0.866817	9.80356e-05	-0.943478	0.00123327	-0.747222	0.0371977	20	-0.2758	0	0.0194	0.237		-4.47456	-4.1262	-3.55691	-4.49112
301	Rhe	Ems	3.23935e+07	5.79347e+06	1989-11-01	2010-10-30	21.0082	0	7407	37.9247	20.958	0.851034	-0.24	0.12	0.126	-0.313144	0.138967	-0.045713	0.927818	-0.667722	0.00339943	20	-0.7859	0.0853	0.0226	0.0301		-1.14515	-1.49415	-3.18599	-0.218117
303	Lat	Ems	3.23863e+07	5.85875e+06	1989-11-01	2010-10-30	21.0082	0	7523	83.0946	13.7133	1.24092	-0.84	0.73	9.83e-07	-0.869274	6.81643e-06	-0.841272	0.00228926	-0.731922	0.000160255	14	1.6804	0.0225	-0.0133	0.4939		-6.12545	-6.33892	-5.33732	-6.13472
321	Mep	Hase	3.23856e+07	5.83883e+06	1989-11-01	1996-10-31
401	Han	Werra	3.25453e+07	5.6966e+06	1989-11-01	2010-10-30	21.0082	0	7581	48.13	44.6611	2.72104	-1.16	0.5	0.000313	-1.21428	0.000326349	-0.985856	0.00861079	-1.7653	7.628e-05	19	-0.2219	0.1903	-0.0198	0.1732		-2.59734	-2.71889	-3.95266	-2.20742
402	Han	Fulda	3.25451e+07	5.69615e+06	1989-11-01	2010-10-30	21.0082	0	7581	62.2148	25.4295	2.20243	-0.65	0.39	0.00239	-0.668343	0.0121987	-0.773739	0.00412153	-0.768539	0.010266	13	-0.624	0.3176	0.0003	0.9851		-2.55609	-2.62822	-3.02224	-3.04269
403	Bod	Weser	3.25354e+07	5.75829e+06	1989-11-01	2010-10-30	21.0082	0	7455	147.327	23.1946	4.02256	-1.07	0.76	2.95e-07	-1.08044	5.91464e-05	-0.958431	0.000160255	-1.34958	0.000802711	17	-0.8294	0	-0.0057	0.4897		-4.61314	-4.65814	-5.81851	-4.13212
405	Int	Weser	3.25102e+07	5.8682e+06	1989-11-01	2010-10-30	21.0082	0	7543	324.473	35.7662	14.8521	-0.87	0.5	0.000366	-0.815301	0.00123327	-0.888175	0.00599747	-0.867263	0.027498	18	-0.8077	0.0032	0.0123	0.328		-2.43247	-2.27953	-2.42482	-2.48328
406	Ham	Weser	3.2524e+07	5.77267e+06	1989-11-01	2010-10-30	21.0082	0	7529	162.45	29.9969	6.21636	-1.36	0.88	3.64e-10	-1.27851	1.57631e-06	-1.20808	0.00020383	-1.49668	1.57631e-06	17	-0.4119	0	0.0134	0.2389		-4.5338	-4.26213	-4.98945	-4.02735
407	Höx	Weser	3.25275e+07	5.73624e+06	1989-11-01	2010-10-30	21.0082	0	7588	142.558	30.2015	5.74251	-0.87	0.69	3.24e-06	-0.899682	4.57021e-05	-0.685349	0.0235268	-1.25816	5.91464e-05	17	-1.0139	0.0298	0.011	0.299		-2.88065	-2.97893	-4.16589	-2.26925
408	Nie	Weser	3.25138e+07	5.83264e+06	1989-11-01	2010-10-30	21.0082	0	7316	201.421	29.1089	7.44749	-1.04	0.7	2.58e-06	-0.99167	3.51909e-05	-0.995726	0.00861079	-1.00017	0.000715426	18	-0.1962	0.0004	0.0175	0.1657		-3.57279	-3.40676	-3.43596	-3.42069
411	Mar	Aller	3.25477e+07	5.83703e+06	1989-11-01	2010-10-30	21.0082	0	7395	37.75	14.1029	0.57001	-0.38	0.63	1.82e-05	-0.374891	0.000802711	-0.123102	0.349219	-0.745127	5.91464e-05	16	-0.7981	0.1482	0.0017	0.9056		-2.69447	-2.65825	-5.28349	-0.872885
412	Ret	Aller	3.25261e+07	5.84853e+06	1989-11-01	2010-10-30	21.0082	0	7437	111.836	20.4563	2.33819	-0.74	0.69	2.78e-06	-0.739876	1.57335e-05	-0.527264	0.00339943	-0.969958	6.58933e-05	15	-0.9899	0.0045	0.0032	0.8609		-3.61747	-3.61687	-4.74162	-2.57752
421	Her	Leine	3.25471e+07	5.80368e+06	1989-11-01	2006-04-13	16.4575	1	5852	51.2522	30.5373	2.23386	-1.75	0.4	0.00617	-1.65244	0.0150836	-3.54825	0.000246235	-1.02913	0.165857	12	-0.1519	0.1711	-0.0717	0.0063		-5.73069	-5.41121		-11.6194
502	Hit	Elbe	3.26371e+07	5.89159e+06	1989-11-01	2010-10-30	21.0082	0	7351	671.448	33.299	19.3166	-0.06	0	0.806	-0.0855401	0.739764	-0.612416	0.00599747	0.760477	0.0371977	11	-0.5119	0.6029	-0.056	0.0243		-0.180185	-0.256885	2.28378	-1.83914
511	Pir	Elbe	3.28467e+07	5.65752e+06	1991-11-01	2010-10-30	19.0082	0	6519	322.687	25.0252	11.0459	-0.96	0.59	0.000124	-1.18696	0.000157813	-1.00133	0.00399311	-1.37267	0.0041201	17	-0.7228	0.001	-0.006	0.6186		-3.83614	-4.74305	-5.48516	-4.00128
512	Tor	Elbe	3.27781e+07	5.71927e+06	1993-11-01	2010-10-30	17.0055	0	5958	361.889	34.6593	16.3879	-1.39	0.73	1.23e-05	-1.36807	0.000177875	-1.10535	0.0119794	-2.04683	0.00113705	16	-0.9033	0.0023	0.0061	0.5548		-4.01046	-3.9472	-5.90557	-3.18917
513	Wit	Elbe	3.27492e+07	5.75184e+06	1991-11-01	2010-10-30	19.0082	0	6726	367.694	30.3579	11.9569	-1.25	0.66	2.34e-05	-1.15175	0.000467783	-0.93642	3.65459e-05	-1.44163	0.0117702	14	0.1045	0.001	-0.0153	0.1972		-4.11754	-3.79391	-4.74878	-3.0846
514	Ake	Elbe	3.27105e+07	5.74978e+06	1991-11-01	2010-10-30	19.0082	0	6614	429.307	26.6302	10.7869	-0.47	0.22	0.0433	-0.371372	0.0358051	-0.343328	0.123715	-0.52587	0.0588622	10	-1.1132	0.7555	-0.0383	0.1163		-1.76491	-1.39455		-1.28924
515	Bar	Elbe	3.26987e+07	5.76185e+06	1989-11-01	2010-10-30	21.0082	2	6757	550.006	35.6982	20.1803	-1.03	0.72	4.03e-06	-1.04201	4.94257e-05	-1.47342	0.00163998	-1.26694	0.00635509	12	-0.991	0.091	-0.0042	0.8817		-2.8853	-2.91893	-3.54904	-4.12743
516	Mag	Elbe	3.2681e+07	5.77862e+06	1992-11-01	2010-10-30	18.0055	0	6407	554.767	28.0644	16.0094	-1.91	0.76	2.06e-06	-1.95344	2.21238e-05	-1.37578	0.0004926	-2.87138	0.000652031	12	-0.395	0.0364	-0.034	0.2135		-6.80577	-6.96055	-10.2314	-4.90221
518	Tan	Elbe	3.27024e+07	5.82634e+06	1991-11-01	2010-10-30	19.0082	0	6814	560.8	33.8497	17.908	-1.26	0.69	1.09e-05	-1.17242	3.65459e-05	-1.06202	0.00128785	-1.63758	0.00128785	13	-0.6422	0.3357	-0.0593	0.0137		-3.72234	-3.46362	-4.83779	-3.13746
519	Wit	Elbe	3.26845e+07	5.87445e+06	1993-11-01	2010-10-30	17.0055	0	6052	696.605	34.4449	21.3281	-0.96	0.38	0.00825	-1.01204	0.00945536	-0.742516	0.000628545	-1.43365	0.0637866	12	-1.0493	0.094	-0.0483	0.0692		-2.78706	-2.93816	-4.16216	-2.15567
520	Mei	Elbe	3.28123e+07	5.67862e+06	1994-11-01	2010-10-30	16.0055	0	5308	341.922	26.9755	10.3353	-1.72	0.68	9.22e-05	-1.68818	0.00255704	-1.26935	0.0170238	-2.14991	0.00189282	12	-1.3289	0.0064	-0.0069	0.7471		-6.37615	-6.25821	-7.96987	-4.70557
531	Cal	Saale	3.26915e+07	5.75407e+06	1991-11-01	2010-10-30	19.0082	0	6781	112.964	29.3992	3.73311	-2.02	0.6	0.000103	-1.9889	0.000606734	-1.75442	0.0096274	-1.94649	0.00100671	6	-0.5139	0.0395	-0.0266	0.5157		-6.87094	-6.76516	-6.62089	-5.96759
541	Rat	Havel	3.27249e+07	5.83372e+06	1991-11-01	2010-10-30	19.0082	0	6845	73.2267	17.2038	1.21603	-0.82	0.85	2.26e-08	-0.827763	1.43647e-05	-0.491799	0.00635509	-1.03998	0.000358992	16	-0.5917	0.0133	-0.0331	0.3456		-4.7664	-4.81152	-6.0451	-2.85867
542	Ket	Havel	3.27618e+07	5.8195e+06	1991-11-01	2010-10-30	19.0082	0	6759	55.7093	14.9629	0.776265	-0.72	0.84	2.7e-08	-0.7247	1.43647e-05	-0.618298	0.000358992	-0.910643	8.91446e-05	12	-0.7138	0.0316	-0.062	0.1363		-4.8119	-4.84332	-6.08601	-4.13221
543	Zeh	Havel	3.27908e+07	5.87918e+06	1991-11-01	2010-10-30	19.0082	0	6731	10.0234	12.0928	0.11668	-0.75	0.83	6.23e-08	-0.740753	1.43647e-05	-0.64246	0.000179856	-0.863696	0.000783342	8	-0.6135	0.0002	0.0086	0.5314		-6.20205	-6.12558	-7.14224	-5.31276
551	Ber	Spree	3.2799e+07	5.82745e+06	1991-11-01	2004-10-19
552	Für	Spree	3.28447e+07	5.81258e+06	1991-11-01	2010-10-30	19.0082	0	6761	18.6176	11.8885	0.22215	-1.04	0.92	1.43e-10	-1.05695	2.2444e-07	-0.742848	2.68964e-05	-1.25543	1.95484e-06	10	-0.5614	0.0105	-0.0685	0.0255		-8.74797	-8.8905	-10.5601	-6.24847
590	Wus	Elbe-Havel-Kanal	3.27285e+07	5.81002e+06	1994-11-01	2010-10-30	16.0055	0	5751	7.47579	14.2782	0.106984	-0.47	0.42	0.00636	-0.562685	0.00456226											-3.29173	-3.94086
601	Fra	Oder	3.2878e+07	5.81576e+06	1991-11-01	2010-10-30	19.0082	0	6462	295.376	25.7814	7.07735	-0.79	0.56	0.000229	-0.848648	0.00128785	-0.521405	0.00512856	-1.43318	0.0041201	14	-1.0795	0.3626	-0.0262	0.3892		-3.06423	-3.29171	-5.55899	-2.02241
602	Hoh	Oder	3.2845e+07	5.86716e+06	1991-11-01	2010-10-30	19.0082	0	6502	502	23.4412	10.591	-0.96	0.66	2.38e-05	-0.954662	0.000208515	-0.589635	0.00207885	-1.30042	0.0100042	15	-0.7584	0.021	-0.0165	0.6031		-4.09534	-4.07257	-5.54756	-2.51537
603	Sch	Oder	3.28561e+07	5.88932e+06	1991-11-01	2010-10-30	19.0082	0	6618	502.893	25.4476	11.3257	-1.02	0.66	2.33e-05	-1.01727	0.000208515	-0.552505	0.0041201	-1.49921	0.00313216	13	-16.957	0.0107	-0.0253	0.4185		-4.00823	-3.99752	-5.89136	-2.17115
									439292
																				1.26816						Max		-0.180185	-0.256885	2.28378	-0.218117
																				-1.01691						Mean		-3.68673	-3.68305	-4.70563	-3.66122
																				-2.87138						Min		-8.74797	-8.8905	-10.5601	-11.6194
																													-3.46362
